# Supplementary material for: Utility of neurological smears for intrasurgical brain cancer diagnostics and tumour cell percentage by DESI-MS
Source: Royal Society of Chemistry journal article supplement (doi:10.1039/c6an02645a), 2017-01-01
Supplement: c6an02645a1.pdf [file c6an02645a1.pdf]

## **Utility of neurological smears for intrasurgical brain cancer diagnostics and tumour cell percentage by DESI-MS**

Valentina Pirro<sup>1</sup>, Alan K. Jarmusch<sup>2</sup>, Clint M. Alfaro<sup>1</sup>, Eyas M. Hattab<sup>2,\*</sup>, Aaron A. Cohen-Gadol<sup>3,\*</sup>, R. Graham Cooks<sup>1,\*</sup>

<sup>1</sup> Department of Chemistry, Purdue University, West Lafayette, IN, USA

<sup>2</sup> Department of Pathology and Laboratory Medicine, University of Louisville, Louisville, KY, USA

<sup>3</sup> Department of Neurological Surgery, Indiana University School of Medicine, Indianapolis, IN, USA

### **\*Corresponding authors**

R Graham Cooks, [cooks@purdue.edu](mailto:cooks@purdue.edu)

Eyas M. Hattab, [eyas.hattab@louisville.edu](mailto:eyas.hattab@louisville.edu)

Aaron A. Cohen-Gadol, [acohenmd@gmail.com](mailto:acohenmd@gmail.com)

## **Supplementary Information**

## Supplementary Materials and Methods

### Specimens

Cryopreserved human neurological specimens were obtained from 29 patients from the Biorepository of the Methodist Research Institute (Purdue IRB # 1410015344). Additional details are reported in Table S1. Tissue smears were prepared from the specimens by removing a small portion of frozen tissue (about 10-50 mm<sup>3</sup>) placing it onto a glass microscope slide allowing the tissue to come to room temperature (approximately 30 s), and then smearing it using a custom 3D printed device (Video S1). The 3D printed device was designed to smear the tissue along the longest dimension of the glass slide, and confine it to the center area with an appropriate thickness (~100  $\mu$ m) in order to avoid excessive dilution of the cellular material, which would negatively affect the MS signal intensity. Indeed, the absolute ion abundance in the mass spectra proved directly related to the quantity and cellularity of the tissue smeared; however, the mass spectral profiles (i.e. relative ion intensities used as chemical signature of the tissue) are grossly uninfluenced by differences in smearing [1]. Confinement of the material to a consistent area of the slide facilitated also the standardization of the moving stage and data acquisition programs. All tissue smears were stored at –80 °C prior to DESI-MS analysis. Smears were H&E stained subsequently to DESI-MS analysis for blind pathological evaluation. The H&E protocol is described in Jarmusch et al. [1] To increase confidence in histopathology, tissue smears and adjacent tissue sections were evaluated always in parallel.

### DESI-MS Imaging

DESI-MS imaging of tissue smears were performed using a linear ion trap mass spectrometer (Finnigan LTQ, Thermo Scientific) coupled with a custom DESI source (similar to Prosolia, Inc. commercial 2D source) equipped with a precision 2D moving stage. DESI-MS was performed using DMF – ACN (1:1 v/v), which preserves tissue morphology for subsequent histopathology. Tissue smears were analyzed twice by DESI-MS imaging in the negative ion mode with automatic gain control (AGC) disabled. The first DESI-MS acquisition (which we will refer to as the lipid profile) included data over  $m/z$  700 - 1000. The second acquisition (the metabolite profile) included data over  $m/z$  80 - 200. Details are reported in Table S2. The moving stage was reset to the X,Y origin in between the lipid and metabolite profile acquisitions in order to image the same area twice. Images were collected as rows by coordinating linear motion of the moving stage with MS acquisition rate, defining resolution of 250  $\mu$ m in both X

and Y axes (Figure S1). An area of 60 mm<sup>2</sup> (12 x 5 mm, 47 x 20 pixels along the X-axis and Y-axis respectively, 250µm pixel size in X and Y) was imaged for each smear.

## **Chemical Diagnosis**

### Data Handling

The MATLAB software (The MathWorks, Inc. Natick, USA) was used to process all data unless otherwise specified. MS data were exported from XCalibur 2.0 and converted into .mzXML files using MSConvertGUI (<http://proteowizard.sourceforge.net/index.shtml>), and then imported into MATLAB using the `mzxmlread.mat` function. In-house MATLAB routines were used to process the data unless otherwise specified. DESI-MS images were reconstructed as datacubes that are composites of the spatial domain (X and Y) and the spectral domain ( $m/z$  values and corresponding ion intensities). The  $m/z$  domain was comprised of 3,600 datapoints for the lipid profile ( $m/z$  700-1000) and 1,400 for the metabolite profile ( $m/z$  80-200), both using an acquisition step of  $m/z$  0.0833. DESI-MS images of tissue smears were used to predict for their tissue state (e.g. glioma) using statistical methods for recognition of mass spectral patterns. Pixels related to the background of the glass slide, where no tissue was smeared, were excluded a priori based on a threshold of signal intensity. Absolute intensities of ions  $m/z$  788, 794, 834, 885, and 888 – glycerophospholipids selectively present in the brain tissue but absent in the glass slide – were summed and then subtracted to the ion intensities of  $m/z$  349 and 363 detected from the background, to define the threshold. Only pixels with mass spectra having the summed ion intensity greater than the threshold were used for chemical predictions. The selected pixels were plotted in red in the 2D spatial domain to double-check the spatial distribution compared to H&E stains (Figure S1). The same pixels were excluded from the lipid and the metabolite profile images. The AGC was deactivated for the acquisition of DESI-MS images to synchronize the duty cycle of the instrument with the position of the moving stage.

### PCA-LDA Prediction of Brain Tumors

Tissue smears were chemically diagnosed as grey matter, white matter or glioma using a linear discriminant analysis (LDA) with data compression by principal component analysis (PCA). The mass spectral patterns detected for the tissue smears were tested against a reference library of spectra that was built using histologically-defined

tissue sections analyzed by DESI-MS imaging. Note that discriminant classification techniques such as LDA normally attribute unknown samples uniquely to one of the categories being modelled with a rigid delineation between categories. DESI-MS images of tissue smears were predicted pixel by pixel, with prior exclusion of the background pixels (i.e. glass slide) where no tissue was smeared. Predictions were shown in the corresponding 2D DESI spatial domain using false-colors (Figure S1). Images serve to provide average values and estimate variance due to any incomplete homogenization of the tissue. Note that pathology evaluation is given for the overall tissue smear consistent with prior tissue mixing. All predictions were validated against pathology done on the same smears subsequently to DESI-MS analysis.

#### Estimation of Tumor Cell Percentage

In parallel with PCA-LDA predictions of tissue state, the ion intensity of NAA ( $m/z$  174) - normalized to the total ion count (TIC) - was used to estimate the percentage of tumor cells via linear regression. The TCP predictions based solely on NAA's intensity stand in contrast to the chemical predictions based on both lipid and metabolite signatures in evaluation of their respective contributions to chemical diagnosis. The linear regression model used to predict TCP in tissue smears is described in Jarmusch et al. [1] TCP was estimated pixel by pixel in the DESI-MS smear images. Values of 0 and 100% were assigned to all samples whom predictions exceeded those values ( $< 0\%$  and  $> 100\%$ ). Predictions were color-coded and shown in the 2D DESI spatial domain (Figure S1). Images of tissue smears served the purpose to estimate variance of TCP prediction, with averages compared to the pathological evaluation.

#### Univariate Statistics

One-sample t-test was used to compare the average prediction for the DESI-MS images to the 'hypothesized' value provided by histopathology. One-way ANOVA was used to test if population means were equal. The median test was used to test if population medians were equal. The null hypothesis  $H_0$  affirms that there are no significant differences. A significance level (a two-tailed p-value) of 0.05 (CI = 95%) was chosen for the statistical test. When the experimental p-value is lower than the critical p-value, the hypothesis  $H_0$  is rejected. The statistical tests were performed in OriginPro 2015 using built-in statistics package.

**Table S1.** Human neurological specimen information

|                 | <b>Pathological Evaluation on Tissue Sections Adjacent to the Smear Tissue</b> |                |                |                      | <b>DESI-MS Smear Image</b> |
|-----------------|--------------------------------------------------------------------------------|----------------|----------------|----------------------|----------------------------|
| <b>Specimen</b> | <b>Diagnosis</b>                                                               | <b>Grade</b>   | <b>Density</b> | <b>TCP</b>           | <b># Pixels</b>            |
| 1               | Normal Grey matter<br>Normal White Matter                                      | -<br>-         | -<br>-         | < 5%<br>< 5%         | 704                        |
| 2               | Glioma                                                                         | High           | High           | 100*                 | 453                        |
| 3               | Normal Grey Matter<br>Normal White Matter                                      | -<br>-         | -<br>-         | < 5%<br>< 5%         | 597                        |
| 4               | Glioma                                                                         | High           | high           | 100*                 | 531                        |
| 5               | Normal Grey Matter                                                             | -              | -              | < 5%                 | 397                        |
| 6               | Normal Grey Matter                                                             | -              | -              | < 5%                 | 474                        |
| 7               | Normal Grey Matter<br>Normal White Matter<br>Glioma                            | -<br>-<br>High | -<br>-<br>High | < 5%<br>< 5%<br>100* | 584                        |
| 8               | Normal Grey Matter                                                             | -              | -              | < 5%                 | 460                        |
| 9               | Glioma                                                                         | High           | High           | 100*                 | 654                        |
| 10              | Infiltrated Grey Matter<br>Infiltrated White Matter                            | -<br>-         | -<br>-         | 10%<br>5%            | 646                        |
| 11              | Infiltrated Grey Matter                                                        | -              | -              | 20%                  | 283                        |
| 12              | Infiltrated White Matter<br>Infiltrated Grey Matter                            | -<br>-         | -<br>-         | 20%<br>25%           | 523                        |
| 13              | Glioma                                                                         | High           | High           | 100*                 | 365                        |
| 14              | Infiltrated Grey Matter<br>Infiltrated White Matter                            | -<br>-         | -<br>-         | 20%<br>10%           | 554                        |
| 15              | Infiltrated Grey Matter<br>Infiltrated White Matter                            | -<br>-         | -<br>-         | 15%<br>15%           | 681                        |
| 16              | Normal Grey Matter<br>Normal White Matter                                      | -<br>-         | -<br>-         | < 5%<br>< 5%         | 775                        |
| 17              | Infiltrated Grey Matter<br>Infiltrated white Matter                            | -<br>-         | -<br>-         | 10<br>10             | 673                        |
| 18              | Normal Grey Matter<br>Glioma                                                   | -<br>High      | -<br>High      | < 5%<br>100*         | 571                        |
| 19              | Infiltrated White Matter<br>Infiltrated Grey Matter                            | -<br>-         | -<br>-         | 20%<br>20%           | 443                        |
| 20              | Infiltrated Grey Matter<br>Infiltrated White Matter                            | -<br>-         | -<br>-         | 15%<br>15%           | 663                        |
| 21              | Infiltrated Grey Matter                                                        | -              | -              | 10%                  | 609                        |
| 22              | Infiltrated Grey Matter                                                        | -              | -              | 10%                  | 638                        |
| 23              | Normal Grey Matter<br>Infiltrated Grey Matter<br>Normal White Matter           | -<br>-<br>-    | -<br>-<br>-    | < 5%<br>10%<br>< 5%  | 468                        |
| 24              | Glioma                                                                         | High           | Medium         | 66.7*                | 608                        |

|    |                                                     |           |             |               |            |
|----|-----------------------------------------------------|-----------|-------------|---------------|------------|
| 25 | Glioma                                              | High      | High        | 100*          | 455        |
| 26 | Infiltrated Grey Matter<br>Normal White Matter      | -<br>-    | -<br>-      | 10 %<br>< 5%  | 369        |
| 27 | Infiltrated Grey Matter<br>Infiltrated White Matter | -<br>-    | -<br>-      | 40%<br>40%    | 759        |
| 28 | Infiltrated Grey Matter<br>Glioma                   | -<br>High | -<br>Medium | 15%<br>66.7*  | 776        |
| 29 | Infiltrated Grey Matter                             | -         | -           | 10%           | 793        |
| 30 | Glioma                                              | High      | Medium      | 66.7*         | Excluded** |
| 31 | Normal Grey Matter<br>Glioma                        | -<br>Low  | -<br>Medium | < 5%<br>66.7* | Excluded** |

\*Values arbitrarily assigned to categorize medium and high density

\*\*Excluded because of low signal.

**Table S2.** Instrumental parameters for DESI-MS imaging

| <i>Full Scan MS</i>              | <b>Lipid Profile <math>m/z</math> 700-1000</b> | <b>Metabolite Profile <math>m/z</math> 80-200</b> |
|----------------------------------|------------------------------------------------|---------------------------------------------------|
| <b>Solvent flow rate</b>         | 1.0 $\mu\text{L}/\text{min}$                   |                                                   |
| <b>Pressure of nitrogen gas</b>  | 160 PSI                                        |                                                   |
| <b>Applied high voltage</b>      | −5 kV                                          |                                                   |
| <b>Incident angle</b>            | 52°                                            |                                                   |
| <b>Spray-to-surface distance</b> | 2-3 mm                                         |                                                   |
| <b>Spray-to-MS distance</b>      | 5-7 mm                                         |                                                   |
| <b>Capillary voltage</b>         | −9 V                                           | −30 V                                             |
| <b>Tube lenses potential</b>     | −150 V                                         | −30 V                                             |
| <b>Tuned mass</b>                | $m/z$ 786                                      | $m/z$ 174                                         |
| <b>Injection time</b>            | 350 ms                                         | 125 ms                                            |
| <b>Microscans</b>                | 2                                              | 4                                                 |
| <b>Speed of the moving stage</b> | 294.117 $\mu\text{m}/\text{s}$                 | 403.225 $\mu\text{m}/\text{s}$                    |
| <b>Pixel size</b>                | 250 $\mu\text{m}$                              |                                                   |

**Table S3.** DESI-MS and pathological evaluations for the tissue smears

| Specimens | Chemical Diagnosis |             |             |                 |                               | Pathological Evaluation |            |            |         |
|-----------|--------------------|-------------|-------------|-----------------|-------------------------------|-------------------------|------------|------------|---------|
|           | PCA-LDA Diagnosis  | # of Pixels | % of Pixels | Average TCP (%) | Standard Deviation in TCP (%) | Diagnosis               | Grade      | Density    | TCP (%) |
| 1         | GM                 | 0           | 0           | 9               | 12                            | WM                      | <i>n/a</i> | <i>n/a</i> | < 5     |
|           | WM                 | 703         | 99.9        |                 |                               |                         |            |            |         |
|           | GL                 | 0           | 0           |                 |                               |                         |            |            |         |
|           | M                  | 0           | 0           |                 |                               |                         |            |            |         |
|           | P                  | 1           | 0           |                 |                               |                         |            |            |         |
| 2         | GM                 | 17          | 3.8         | 33              | 18                            | GL                      | High       | High       | 100*    |
|           | WM                 | 39          | 8.6         |                 |                               |                         |            |            |         |
|           | GL                 | 395         | 87.2        |                 |                               |                         |            |            |         |
|           | M                  | 0           | 0.0         |                 |                               |                         |            |            |         |
|           | P                  | 2           | 0.4         |                 |                               |                         |            |            |         |
| 3         | GM                 | 504         | 84.4        | 28              | 20                            | GM                      | <i>n/a</i> | <i>n/a</i> | < 5     |
|           | WM                 | 9           | 1.5         |                 |                               |                         |            |            |         |
|           | GL                 | 84          | 14.1        |                 |                               |                         |            |            |         |
|           | M                  | 0           | 0.0         |                 |                               |                         |            |            |         |
|           | P                  | 0           | 0.0         |                 |                               |                         |            |            |         |
| 4         | GM                 | 0           | 0.0         | 99              | 3                             | GL                      | High       | Medium     | 66.7*   |
|           | WM                 | 1           | 0.2         |                 |                               |                         |            |            |         |
|           | GL                 | 530         | 99.8        |                 |                               |                         |            |            |         |
|           | M                  | 0           | 0.0         |                 |                               |                         |            |            |         |
|           | P                  | 0           | 0.0         |                 |                               |                         |            |            |         |
| 5         | GM                 | 370         | 93.2        | 18              | 14                            | GM                      | <i>n/a</i> | <i>n/a</i> | < 5     |
|           | WM                 | 0           | 0.0         |                 |                               |                         |            |            |         |
|           | GL                 | 27          | 6.8         |                 |                               |                         |            |            |         |
|           | M                  | 0           | 0.0         |                 |                               |                         |            |            |         |
|           | P                  | 0           | 0.0         |                 |                               |                         |            |            |         |
| 6         | GM                 | 384         | 81.0        | 11              | 8                             | GM                      | <i>n/a</i> | <i>n/a</i> | < 5     |
|           | WM                 | 80          | 16.9        |                 |                               |                         |            |            |         |
|           | GL                 | 10          | 2.1         |                 |                               |                         |            |            |         |
|           | M                  | 0           | 0.0         |                 |                               |                         |            |            |         |
|           | P                  | 0           | 0.0         |                 |                               |                         |            |            |         |
| 7         | GM                 | 291         | 49.8        | 13              | 10                            | GM                      | <i>n/a</i> | <i>n/a</i> | < 5     |
|           | WM                 | 73          | 12.5        |                 |                               |                         |            |            |         |
|           | GL                 | 220         | 37.7        |                 |                               |                         |            |            |         |
|           | M                  | 0           | 0.0         |                 |                               |                         |            |            |         |
|           | P                  | 0           | 0.0         |                 |                               |                         |            |            |         |
| 8         | GM                 | 322         | 69.8        | 22              | 10                            | GM                      | <i>n/a</i> | <i>n/a</i> | < 5     |
|           | WM                 | 0           | 0.0         |                 |                               |                         |            |            |         |
|           | GL                 | 138         | 29.9        |                 |                               |                         |            |            |         |
|           | M                  | 0           | 0.0         |                 |                               |                         |            |            |         |
|           | P                  | 1           | 0.2         |                 |                               |                         |            |            |         |



|    |    |     |       |    |    |     |      |      |      |
|----|----|-----|-------|----|----|-----|------|------|------|
| 9  | GM | 0   | 0.0   | 96 | 6  | GL  | High | High | 100* |
|    | WM | 0   | 0.0   |    |    |     |      |      |      |
|    | GL | 654 | 100.0 |    |    |     |      |      |      |
|    | M  | 0   | 0.0   |    |    |     |      |      |      |
|    | P  | 0   | 0.0   |    |    |     |      |      |      |
| 10 | GM | 194 | 30.0  | 19 | 11 | GM  | n/a  | n/a  | 20   |
|    | WM | 218 | 33.8  |    |    |     |      |      |      |
|    | GL | 234 | 36.2  |    |    |     |      |      |      |
|    | M  | 0   | 0.0   |    |    |     |      |      |      |
|    | P  | 0   | 0.0   |    |    |     |      |      |      |
| 11 | GM | 19  | 6.7   | 28 | 12 | GM  | n/a  | n/a  | 20   |
|    | WM | 0   | 0.0   |    |    |     |      |      |      |
|    | GL | 264 | 93.3  |    |    |     |      |      |      |
|    | M  | 0   | 0.0   |    |    |     |      |      |      |
|    | P  | 0   | 0.0   |    |    |     |      |      |      |
| 12 | GM | 523 | 100.0 | 2  | 6  | GM  | n/a  | n/a  | 25   |
|    | WM | 0   | 0.0   |    |    |     |      |      |      |
|    | GL | 0   | 0.0   |    |    |     |      |      |      |
|    | M  | 0   | 0.0   |    |    |     |      |      |      |
|    | P  | 0   | 0.0   |    |    |     |      |      |      |
| 13 | GM | 0   | 0.0   | 98 | 5  | GL  | High | High | 100* |
|    | WM | 0   | 0.0   |    |    |     |      |      |      |
|    | GL | 365 | 100.0 |    |    |     |      |      |      |
|    | M  | 0   | 0.0   |    |    |     |      |      |      |
|    | P  | 0   | 0.0   |    |    |     |      |      |      |
| 14 | GM | 0   | 0.0   | 28 | 14 | n/a | n/a  | n/a  | 10   |
|    | WM | 546 | 98.6  |    |    |     |      |      |      |
|    | GL | 8   | 1.4   |    |    |     |      |      |      |
|    | M  | 0   | 0.0   |    |    |     |      |      |      |
|    | P  | 0   | 0.0   |    |    |     |      |      |      |
| 15 | GM | 648 | 95.2  | 6  | 8  | GM  | n/a  | n/a  | 10   |
|    | WM | 0   | 0.0   |    |    |     |      |      |      |
|    | GL | 33  | 4.8   |    |    |     |      |      |      |
|    | M  | 0   | 0.0   |    |    |     |      |      |      |
|    | P  | 0   | 0.0   |    |    |     |      |      |      |
| 16 | GM | 129 | 16.6  | 39 | 14 | GM  | n/a  | n/a  | 10   |
|    | WM | 0   | 0.0   |    |    |     |      |      |      |
|    | GL | 646 | 83.4  |    |    |     |      |      |      |
|    | M  | 0   | 0.0   |    |    |     |      |      |      |
|    | P  | 0   | 0.0   |    |    |     |      |      |      |
| 17 | GM | 225 | 33.4  | 50 | 16 | GM  | n/a  | n/a  | 10   |
|    | WM | 0   | 0.0   |    |    |     |      |      |      |
|    | GL | 448 | 66.6  |    |    |     |      |      |      |
|    | M  | 0   | 0.0   |    |    |     |      |      |      |
|    | P  | 0   | 0.0   |    |    |     |      |      |      |

|    |    |     |      |    |    |    |      |        |       |
|----|----|-----|------|----|----|----|------|--------|-------|
| 18 | GM | 178 | 31.2 | 31 | 24 | GL | High | Medium | 66.7* |
|    | WM | 0   | 0.0  |    |    |    |      |        |       |
|    | GL | 393 | 68.8 |    |    |    |      |        |       |
|    | M  | 0   | 0.0  |    |    |    |      |        |       |
|    | P  | 0   | 0.0  |    |    |    |      |        |       |
| 19 | GM | 68  | 15.3 | 63 | 13 | GM | n/a  | n/a    | 10    |
|    | WM | 0   | 0.0  |    |    |    |      |        |       |
|    | GL | 375 | 84.7 |    |    |    |      |        |       |
|    | M  | 0   | 0.0  |    |    |    |      |        |       |
|    | P  | 0   | 0.0  |    |    |    |      |        |       |
| 20 | GM | 565 | 85.2 | 15 | 12 | GM | n/a  | n/a    | 10    |
|    | WM | 0   | 0.0  |    |    |    |      |        |       |
|    | GL | 98  | 14.8 |    |    |    |      |        |       |
|    | M  | 0   | 0.0  |    |    |    |      |        |       |
|    | P  | 0   | 0.0  |    |    |    |      |        |       |
| 21 | GM | 455 | 74.5 | 15 | 15 | GM | n/a  | n/a    | 10    |
|    | WM | 2   | 0.3  |    |    |    |      |        |       |
|    | GL | 154 | 25.2 |    |    |    |      |        |       |
|    | M  | 0   | 0.0  |    |    |    |      |        |       |
|    | P  | 0   | 0.0  |    |    |    |      |        |       |
| 22 | GM | 234 | 36.7 | 20 | 14 | GM | n/a  | n/a    | 10    |
|    | WM | 0   | 0.0  |    |    |    |      |        |       |
|    | GL | 404 | 63.3 |    |    |    |      |        |       |
|    | M  | 0   | 0.0  |    |    |    |      |        |       |
|    | P  | 0   | 0.0  |    |    |    |      |        |       |
| 23 | GM | 385 | 82.3 | 3  | 8  | GM | n/a  | n/a    | 10    |
|    | WM | 3   | 0.6  |    |    |    |      |        |       |
|    | GL | 80  | 17.1 |    |    |    |      |        |       |
|    | M  | 0   | 0.0  |    |    |    |      |        |       |
|    | P  | 0   | 0.0  |    |    |    |      |        |       |
| 24 | GM | 1   | 0.2  | 87 | 15 | GL | High | Low    | n/a   |
|    | WM | 2   | 0.3  |    |    |    |      |        |       |
|    | GL | 589 | 96.1 |    |    |    |      |        |       |
|    | M  | 19  | 3.1  |    |    |    |      |        |       |
|    | P  | 2   | 0.3  |    |    |    |      |        |       |
| 25 | GM | 0   | 0.0  | 99 | 3  | GL | High | Medium | 66.7* |
|    | WM | 0   | 0.0  |    |    |    |      |        |       |
|    | GL | 18  | 4.0  |    |    |    |      |        |       |
|    | M  | 9   | 2.0  |    |    |    |      |        |       |
|    | P  | 428 | 94.1 |    |    |    |      |        |       |
| 26 | GM | 0   | 0.0  | 56 | 14 | GL | High | Medium | 66.7* |
|    | WM | 366 | 99.2 |    |    |    |      |        |       |
|    | GL | 3   | 0.8  |    |    |    |      |        |       |
|    | M  | 0   | 0.0  |    |    |    |      |        |       |
|    | P  | 0   | 0.0  |    |    |    |      |        |       |

|    |    |     |      |    |    |    |      |        |       |
|----|----|-----|------|----|----|----|------|--------|-------|
| 27 | GM | 131 | 17.3 | 46 | 15 | GL | High | Medium | 66.7* |
|    | WM | 0   | 0.0  |    |    |    |      |        |       |
|    | GL | 628 | 82.7 |    |    |    |      |        |       |
|    | M  | 0   | 0.0  |    |    |    |      |        |       |
|    | P  | 0   | 0.0  |    |    |    |      |        |       |
| 28 | GM | 5   | 0.6  | 69 | 11 | GL | High | Medium | 66.7* |
|    | WM | 0   | 0.0  |    |    |    |      |        |       |
|    | GL | 771 | 99.4 |    |    |    |      |        |       |
|    | M  | 0   | 0.0  |    |    |    |      |        |       |
|    | P  | 0   | 0.0  |    |    |    |      |        |       |
| 29 | GM | 633 | 79.8 | 6  | 9  | GM | n/a  | n/a    | < 5   |
|    | WM | 114 | 14.4 |    |    |    |      |        |       |
|    | GL | 46  | 5.8  |    |    |    |      |        |       |
|    | M  | 0   | 0.0  |    |    |    |      |        |       |
|    | P  | 0   | 0.0  |    |    |    |      |        |       |

n/a = not provided.

\*Values arbitrary assigned to categorize medium and high density.

**Table S4.** Descriptive statistics for TCP distribution between DESI-MS smear images. Medians are statistically different (p-value <0.05)

|                            | <b>Low TCP</b> | <b>Medium TCP</b> | <b>High TCP</b> |
|----------------------------|----------------|-------------------|-----------------|
| <b>Minimum</b>             | 0              | 0                 | 0               |
| <b>Median</b>              | 15             | 71                | 96              |
| <b>Interquartile Range</b> | 28             | 55                | 49              |
| <b>Maximum</b>             | 100            | 100               | 100             |
| <b>Number of Pixels*</b>   | 10968          | 4074              | 1472            |

\*Total number of pixels selected for chemical diagnosis from 29 images

**Table S5.** Row-by-row predictions for DESI-MS smear images of the heterogeneous specimens # 10 and 18.

|                              | Specimen # 10 |         | Specimen # 18 |         |
|------------------------------|---------------|---------|---------------|---------|
|                              | # pixels      | TCP     | # pixels      | TCP     |
| <b>Average DESI-MS image</b> | 646           | 19±11*  | 571           | 31±24   |
| <b>Line 1</b>                | 34            | 8±10**  | 32            | 13±17   |
| <b>Line 2</b>                | 34            | 14±11   | 31            | 19±21   |
| <b>Line 3</b>                | 32            | 14±8    | 29            | 25±25   |
| <b>Line 4</b>                | 32            | 16±5    | 28            | 25±24   |
| <b>Line 5</b>                | 31            | 15±7    | 28            | 28±23   |
| <b>Line 6</b>                | 31            | 14±7    | 29            | 31±25   |
| <b>Line 7</b>                | 31            | 15±7    | 28            | 29±20   |
| <b>Line 8</b>                | 31            | 15±8    | 29            | 33±23   |
| <b>Line 9</b>                | 32            | 19±12   | 29            | 29±22   |
| <b>Line 10</b>               | 32            | 17±8    | 28            | 30±23   |
| <b>Line 11</b>               | 33            | 18±7    | 29            | 29±24   |
| <b>Line 12</b>               | 32            | 18±12   | 29            | 33±25   |
| <b>Line 13</b>               | 36            | 23±14   | 28            | 31±23   |
| <b>Line 14</b>               | 33            | 19±7    | 28            | 34±22   |
| <b>Line 15</b>               | 32            | 19±6    | 28            | 30±23   |
| <b>Line 16</b>               | 32            | 20±7    | 28            | 31±23   |
| <b>Line 17</b>               | 33            | 22±9    | 28            | 35±24   |
| <b>Line 18</b>               | 32            | 23±9    | 28            | 42±24   |
| <b>Line 19</b>               | 33            | 29±11   | 27            | 51±22** |
| <b>Line 20</b>               | 30            | 38±13** | 27            | 51±21** |

\*Mean ± Standard Deviation

\*\*Line averages statistically different from the other lines with 95% IC (p-value<0.05)

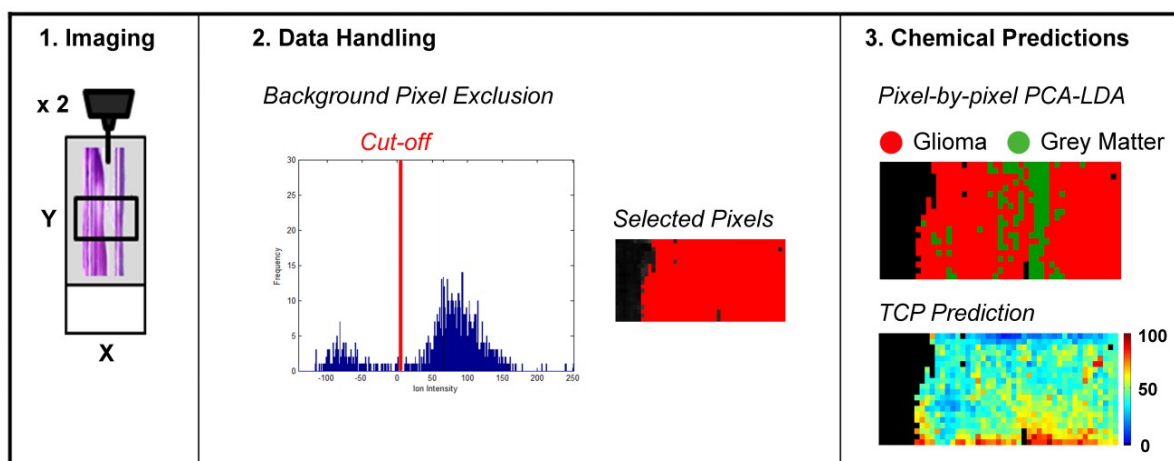

**Fig. S1.** Schematic description of DESI-MS imaging and data analysis workflow. **1.** For each smear, an area of 60 mm<sup>2</sup> was imaged by DESI-MS. **2.** Based on a threshold of ion intensities, background areas were excluded from data analysis. Pixels with ion intensities greater than the threshold were selected for data analysis. **3.** Individual pixels were chemically predicted by PCA-LDA. TCP values were estimated by linear regression of NAA's ion intensity. Predictions were color-coded and shown in the 2D DESI-MS spatial domain.

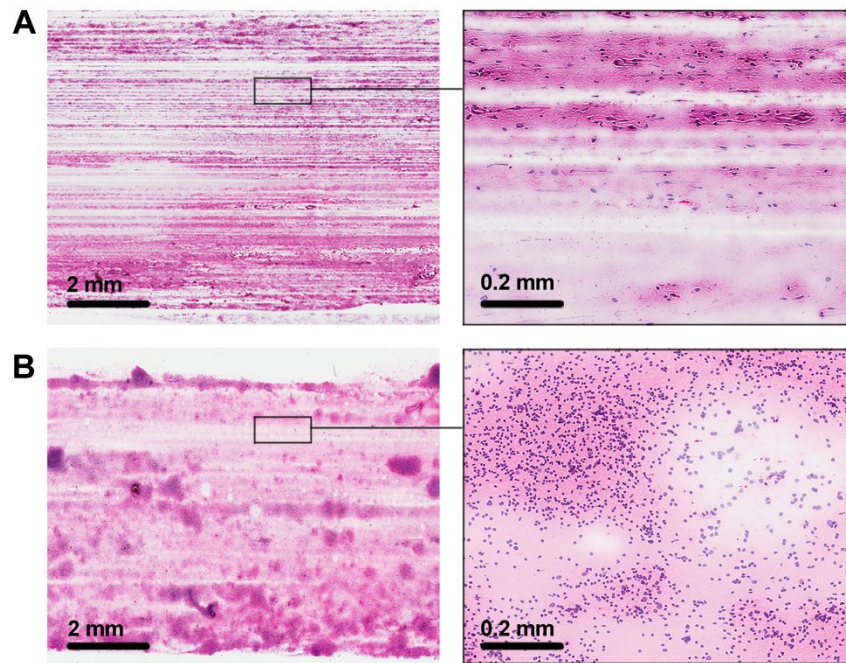

**Fig. S2 (a)** H&E stain of specimen # 18 with magnified region inset. **(b)** H&E stain of specimen # 28 with magnified region inset.

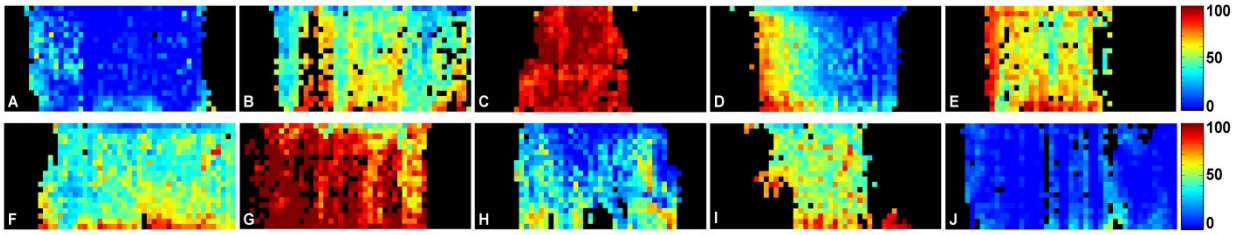

**Fig. S3** Pixel-by-pixel TCP predictions based on NAA intensity of **(a)** specimen # 1 (infiltrated white matter with < 5% TCP by histopathology), **(b)** specimen # 17 (infiltrated grey matter with 10% TCP), **(c)** specimen # 4 (high grade medium density glioma), **(d)** specimen # 18 (high grade medium density glioma), **(e)** specimen # 19 (infiltrated grey with 20% TCP), **(f)** specimen # 27 (high grade medium density glioma), **(g)** specimen # 24 (high grade glioma), **(h)** specimen # 3 (infiltrated grey matter with < 5% TCP), **(i)** specimen # 26 (high grade medium density glioma), **(j)** specimen # 29 (infiltrated grey matter with < 5% TCP).



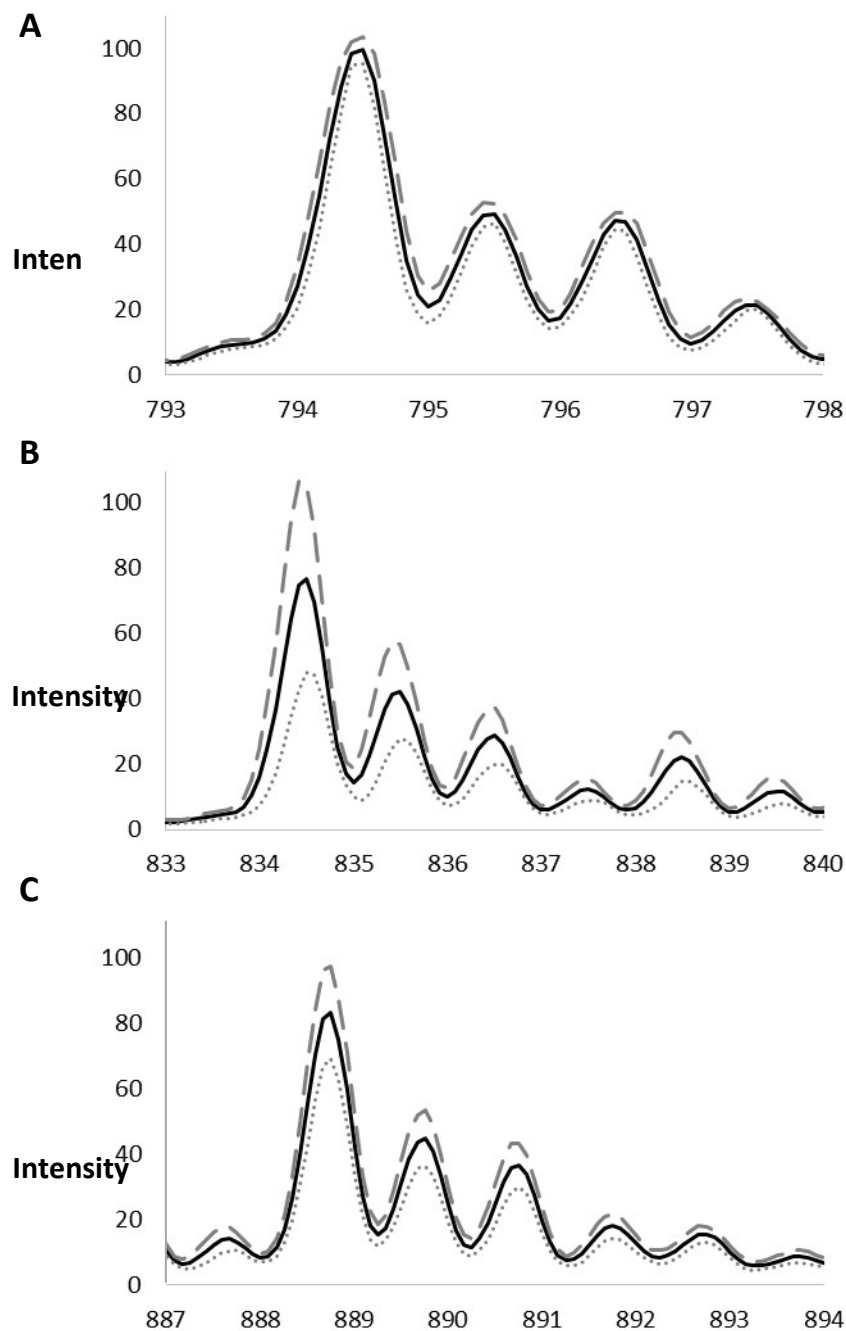

**Fig. S4.** Plot of line-by-line average peaks with standard deviation. **(a)**  $m/z$  794, PC 34:1+Cl-, **(b)**  $m/z$  834, PS 18:0\_22:6, and **(c)**  $m/z$  888, (3'-sulfo)GalCer 24:1 of specimen # 10. Mean denoted by solid black line; mean + three times the standard deviation illustrated by the dashed line; mean - three times the standard deviation illustrated by the dotted line.
